# Supplementary material for: Methylphenidate Differentially Affects Intrinsic Functional Connectivity of the Salience Network in Adult ADHD Treatment Responders and Non-Responders
Source: MDPI journal article supplement (doi:10.3390/biology11091320), 2022-09-06
Supplement: s1 [file s1]

# Methylphenidate Differentially Affects Intrinsic Functional Connectivity of the Salience Network in Adult ADHD Treatment Responders and Non-Responders

Martin Ulrich <sup>1,\*†</sup>, Katharina Heckel <sup>1,†</sup>, Markus Kölle <sup>2</sup> and Georg Grön <sup>1</sup>

<sup>1</sup>Section Neuropsychology and Functional Imaging, Department Psychiatry, Ulm University, 89075 Ulm, Germany

<sup>2</sup>Department of Psychiatry and Psychotherapy, Bonn University, 53127 Bonn, Germany

\* Correspondence: martin.ulrich@uni-ulm.de

† These authors contributed equally to this work.

## Supplementary Material

**Table S1.** Demographic and clinical characteristics of Responders and Non-Responders of ADHD patients at baseline (M1) and after around six weeks of methylphenidate medication (M2).

| Variable         | Responders      |                 | Non-Responders   |                 | t-value (d.f. 51)         | p-value |           |
|------------------|-----------------|-----------------|------------------|-----------------|---------------------------|---------|-----------|
| N                | 36              |                 | 17               |                 |                           |         |           |
| Female/Male      | 11/25           |                 | 4/13             |                 |                           |         |           |
| Age              | 27.3 (5.4)      |                 | 26.4 (5.6)       |                 | 0.61                      | 0.546   |           |
| Years of school  | 10.9 (1.7)      |                 | 10.4 (1.8)       |                 | 0.90                      | 0.375   |           |
| Estimated IQ     | 115 (11.7)      |                 | 109 (14.4)       |                 | 1.51                      | 0.136   |           |
|                  |                 |                 |                  |                 | Group-by-Time interaction | p-value | Cohen's d |
|                  | M1              | M2              | M1               | M2              | F(1,51)                   |         |           |
| DSM-IV A1        | 6.86<br>(1.27)  | 0.64<br>(0.87)  | 7.47<br>(1.12)   | 4.53<br>(1.84)  | 43.08                     | < 0.001 | 1.84      |
| DSM-IV A2        | 4.61<br>(2.26)  | 0.47<br>(0.81)  | 5.00<br>(2.98)   | 2.82<br>(2.16)  | 9.27                      | 0.004   | 0.85      |
| CAARS_DSM-IA_S   | 18.31<br>(3.95) | 8.06<br>(4.14)  | 20.82<br>(4.25)  | 17.18<br>(3.94) | 15.90                     | < 0.001 | 1.12      |
| CAARS_DSM-HY/I_S | 14.08<br>(5.42) | 6.42<br>(3.32)  | 16.06<br>(6.76)  | 13.00<br>(5.36) | 10.39                     | 0.002   | 0.90      |
| CAARS_DSM-ADHD_S | 32.33<br>(7.33) | 14.47<br>(6.31) | 36.29<br>(10.29) | 29.59<br>(6.89) | 14.94                     | < 0.001 | 1.08      |
| CAARS_DSM-IA_O   | 16.58<br>(5.20) | 8.78<br>(4.29)  | 17.24<br>(4.91)  | 15.12<br>(4.12) | 10.89                     | 0.002   | 0.92      |
| CAARS_DSM-HY/I_O | 11.97<br>(6.14) | 6.25<br>(3.32)  | 12.76<br>(6.84)  | 10.29<br>(4.97) | 3.87                      | 0.055   | 0.55      |
| CAARS_DSM-ADHD_O | 28.56<br>(9.54) | 15.00<br>(6.27) | 29.94<br>(9.09)  | 25.29<br>(6.73) | 7.99                      | 0.007   | 0.79      |

Values are means; standard deviations (SD) in parentheses; IA: inattention; HY/I: hyperactivity/impulsivity; \_S: self-assessment, \_O: assessment by third party (others)

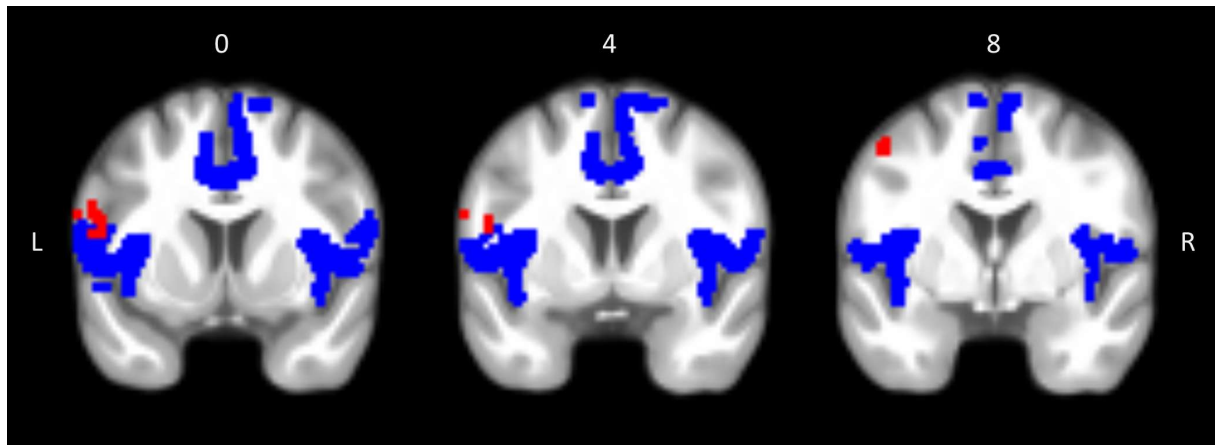

**Figure S1.** Visualization of aspects of the Saliency Resting State Network (RSN) in blue and the seed region belonging to this RSN in red color. Please note that only those aspects of the Saliency RSN are visualized where it coincided with the visualization of the seed region. A full picture of the Saliency RSN can be found in: Doucet, G.E.; Lee, W.H.; Frangou, S. Evaluation of the spatial variability in the major resting-state networks across human brain functional atlases. *Hum. Brain Mapp.* 2019, *40*, 4577-4587. Coordinates refer to MNI space. Abbreviations: L: left; R: right.
